# Supplementary material
Source: PubMed Central journal article supplement (PMC2917705)

## Supplemental Data

### Heterozygous Germline Mutations in the *CBL* Tumor-Suppressor

#### Gene Cause a Noonan Syndrome-like Phenotype

Simone Martinelli, Alessandro De Luca, Emilia Stellacci, Cesare Rossi, Saula Checquolo, Francesca Lepri, Viviana Caputo, Marianna Silvano, Francesco Buscherini, Federica Consoli, Grazia Ferrara, Maria C. Digilio, Maria L. Cavaliere, Johanna M. van Hagen, Giuseppe Zampino, Ineke van der Burgt, Giovanni B. Ferrero, Laura Mazzanti, Isabella Screpanti, Helger G. Yntema, Willy M. Nillesen, Ravi Savarirayan, Martin Zenker, Bruno Dallapiccola, Bruce D. Gelb, and Marco Tartaglia

**Table S1. Primer pairs and annealing temperatures used to amplify the *CBL* coding sequence, and sizes of PCR products.**

| Exon | Primer Sequence (5'→3')  |                         | Ann. Temp. (°C) | Product Length (bp) |
|------|--------------------------|-------------------------|-----------------|---------------------|
|      | Forward                  | Reverse                 |                 |                     |
| 1    | TTCACGCCCTGCTTCTCTCC     | TTCCTCCGTCCGCTCGTTCC    | 62 <sup>a</sup> | 355                 |
| 2    | CAATGGGGTTATGGATCTGC     | CTATGTGTTACCCATTCAGGC   | 57              | 461                 |
| 3    | CTTGTATGGTGAATTTGGTGC    | ATTACTTTTCTCAGAGTTCCC   | 55              | 334                 |
| 4    | TTGATTATGGCGATGCCTGG     | TTTCTCTTCACCGAAGTAGC    | 56              | 281                 |
| 5    | CTCTGAGTTGGTTGTACATCTGAC | CAGAACCTTGGCTATTGCGAAAC | 60              | 290                 |
| 6    | TTGCCTTCCACCGTAATACC     | TCCCAGACTCTAACAGATGG    | 57              | 236                 |
| 7    | ATGGAGAAACTCCCAGATTCC    | AGCTTGTGTCCAGTGATATGG   | 58              | 221                 |
| 8    | GTATAGGAAACAAGTCTTCAC    | TCCAAGGTTATTACATAGCTG   | 54              | 270                 |
| 9    | AGCCTTTACTGATACAAGGG     | TAGAAGACAACCTCACAATGG   | 54              | 404                 |
| 10   | TTAGGAGAGTTGAAAGATGCC    | TGTGGAAGCAGGGTGAAAGC    | 60              | 286                 |
| 11   | GCTTCTGCTCTTGGAAGTGC     | ACAGACATGAGCCACTGTGC    | 65 <sup>a</sup> | 566                 |
| 12   | AATAAGAGCAGAGGCTCAGC     | AATCATTTCTACATGGTGCAG   | 54              | 289                 |
| 13   | GGTGACATGTATTTTGTCTCTG   | GGTGAAGGGTGTCAATTACC    | 56              | 300                 |
| 14   | CATACACTATAACTTGCCAC     | GATCAAGCTATCTCAATTGCC   | 56              | 322                 |
| 15   | TCTGTTTACATGGTGTGTTGGC   | AAACATACAGGCCACACTGC    | 60              | 395                 |
| 16   | ACATGTACCCAGTTTACAGG     | TAACTCCCAACTCACTGGTC    | 56              | 452                 |

<sup>a</sup>Exon 1 and exon 11 PCR products were amplified using FastStart Taq DNA Polymerase (Roche Diagnostics) in a buffer containing 1X GC rich solution (Roche Diagnostics).

**Figure S1. Germline origin of *CBL* mutations causing a Noonan syndrome-like phenotype.**

(A) Sequence electropherograms of the *de novo* c.1100A>C (Gln367Pro) and c.1168G>T

(Asp390Tyr) missense changes documenting the heterozygous state in hair bulb cells and/or oral mucosal epithelial cells from sporadic cases NMC-NS076 and ISS-S1N51. (B) Partial amino acid

sequence alignment of *CBL* orthologs and paralogs showing conservation of Gln<sup>367</sup>, Lys<sup>382</sup>, Asp<sup>390</sup> and Arg<sup>420</sup> (arrows).

**A**

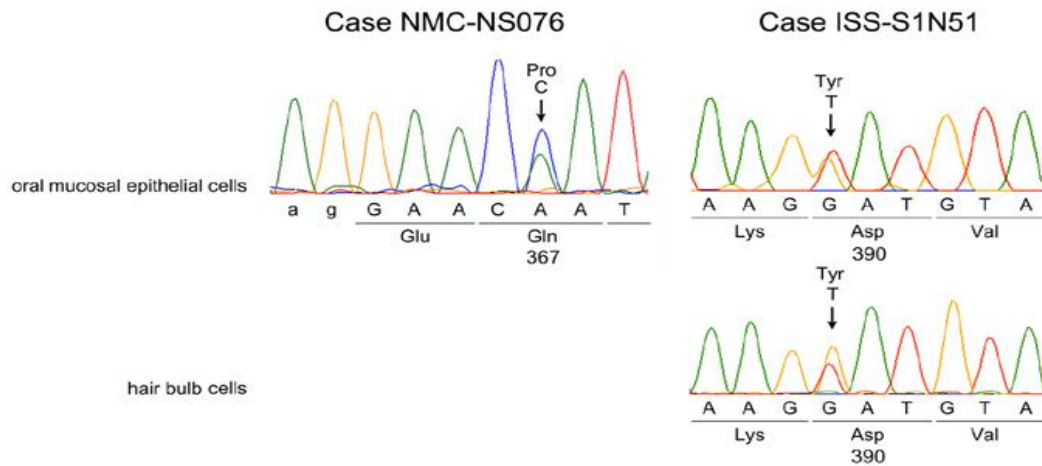

**B**

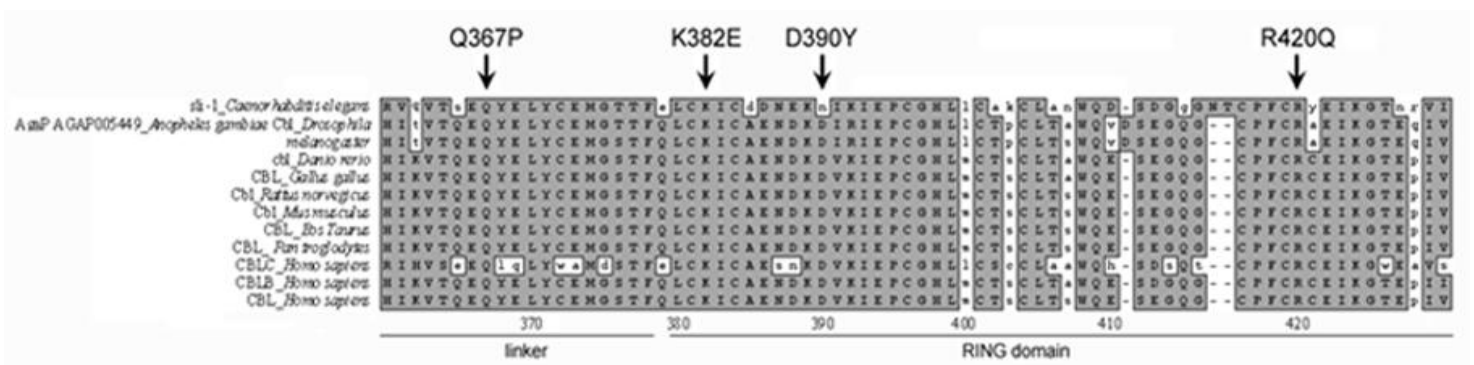

**Figure S2. Location of mutated CBL amino acid residues in the three-dimensional structure of the protein complexed with the E2 ubiquitin-conjugating protein UBE2L3.** C $\alpha$  ribbon trace of the CBL tyrosine kinase binding domain (cyan), linker (orange), and RING finger domain (red) of CBL are shown together with the interacting portion of UBE2L3 (gray).<sup>40</sup> Mutated residues identified in this study are indicated with their side chains as blue thick lines. Residues of the linker (magenta) or RING domain (yellow) mutated in myeloid malignancies are also shown with their side chains. Visualization and analysis of the molecular structure was performed using the program UCSF Chimera.<sup>54</sup>

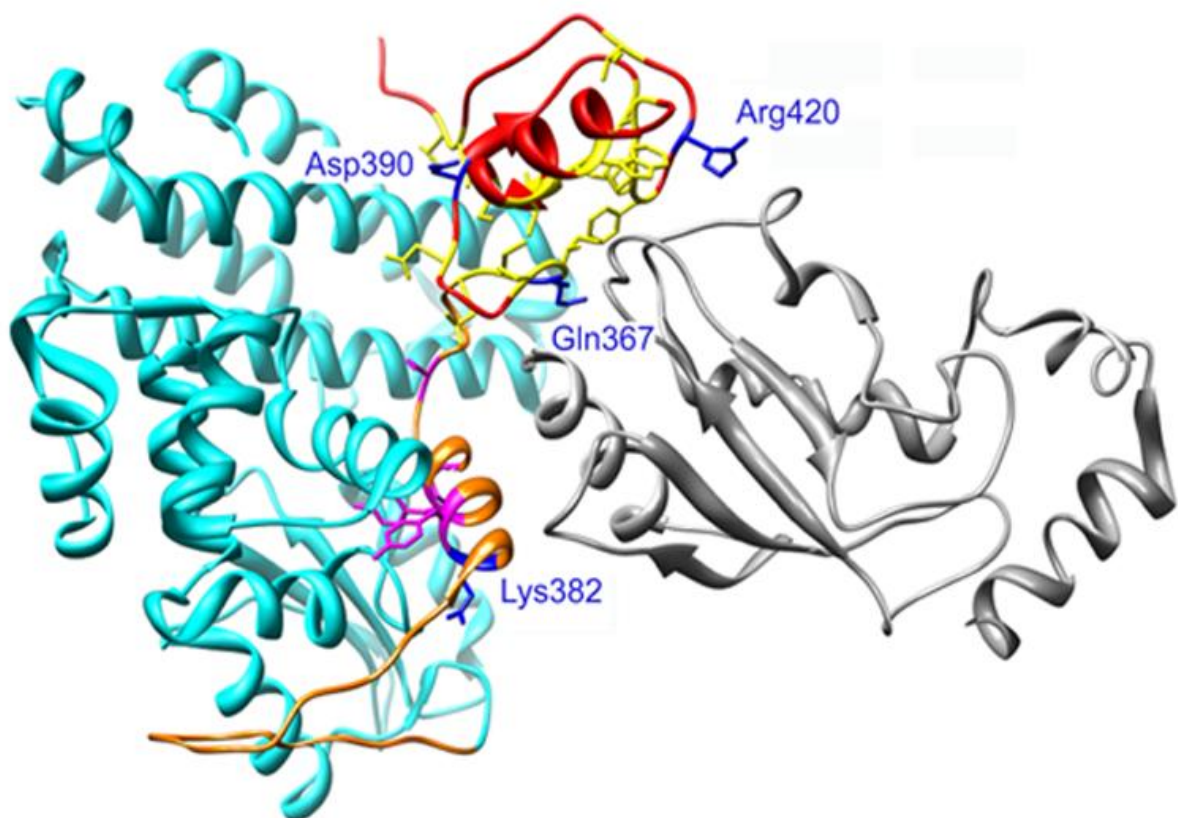

Supplement: mmc1.pdf [file mmc1.pdf]
